# Supplementary material for: Tetramethylpyrazine Attenuates the Endotheliotoxicity and the Mitochondrial Dysfunction by Doxorubicin via 14-3-3γ/Bcl-2
Source: Hindawi journal article supplement (doi:10.1155/2019/5820415), 2019-12-03
Supplement: f1 [file 5820415.f1.pdf]

## Supplementary materials

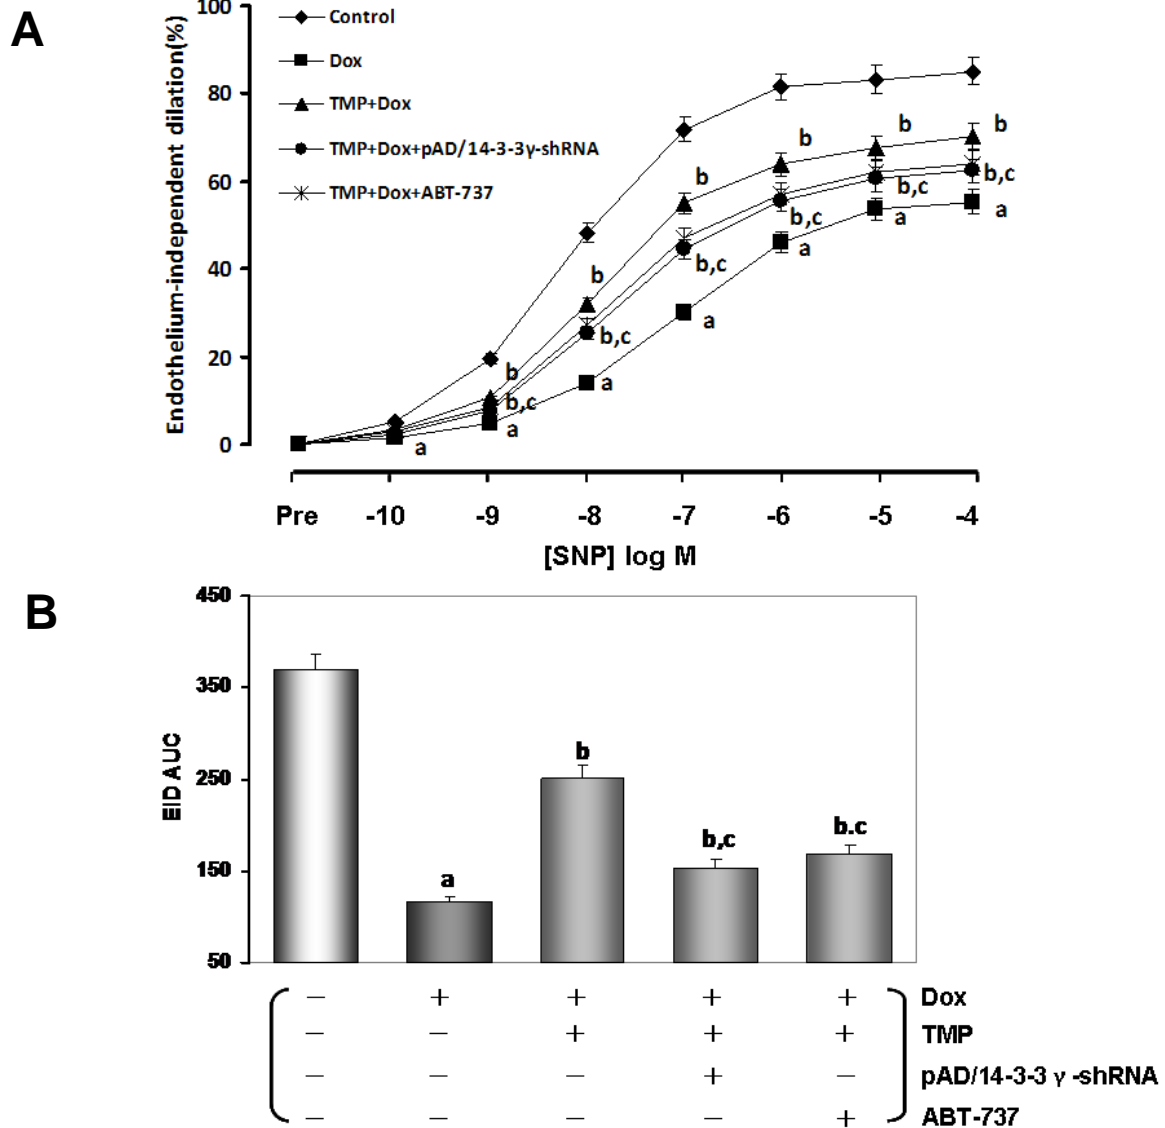

**Figure S1: Effects of TMP on vascular reactivity of mice's thoracic aortas (endothelium-independent dilation, EID).** (A) Endothelium-independent dilation (EID) of the thoracic aortic strips. (B) Area under of the curve for EID of the thoracic aortic strips. Data are presented as the mean  $\pm$  SEM. for fifteen individual experiments. a:  $P < 0.01$ , versus control group; b:  $P < 0.01$ , versus Dox group; c:  $P < 0.01$ , versus TMP+Dox group.

**A**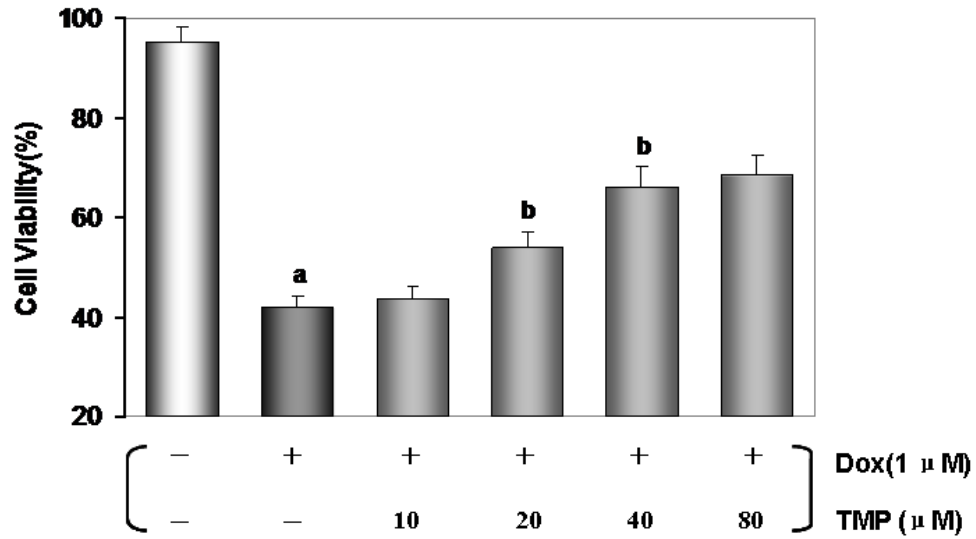**B**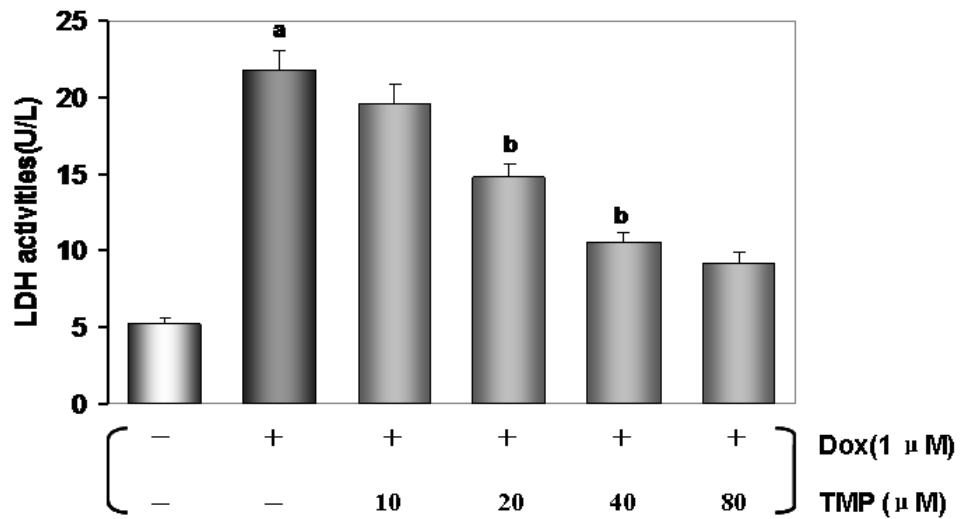

**Figure S2: TMP protects HUVECs against the endotheliotoxicity induced by Dox.**

TMP-treated significantly increased cell viability and reduced LDH activity ( $P < 0.01$ ) in a concentration-dependent manner. (A) Histogram of the cell viability. (B) Histogram of the LDH activity. Data are presented as the mean  $\pm$  SEM for eight individual experiments. Data are presented as the mean  $\pm$  SEM for eight individual experiments. a:  $P < 0.01$ , versus control group; b:  $P < 0.01$ , versus prior dosage.

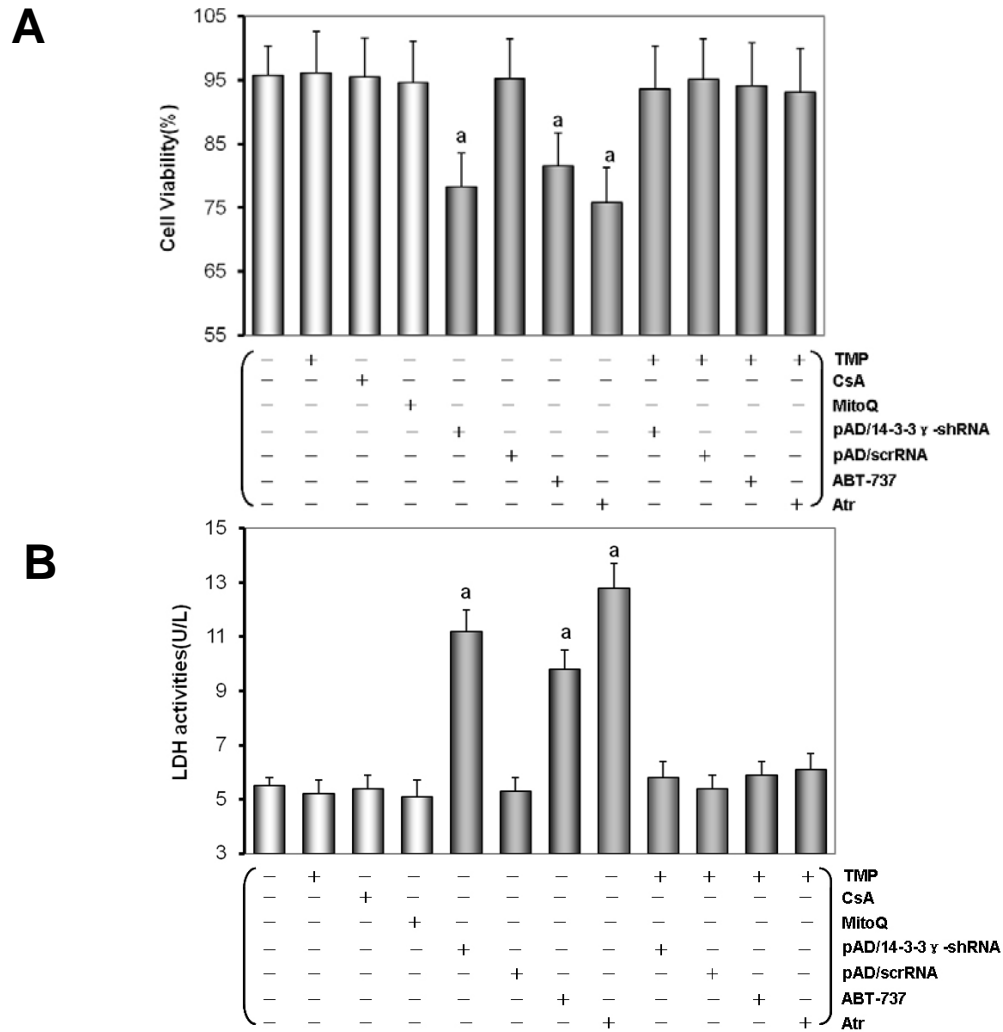

**Figure S3: Effects of TMP/CsA/MitoQ, or downregulated 14-3-3 $\gamma$  expression, or inhibited Bcl-2 activity on the cell viability and LDH activity of normal HUVECs.** Cell viability and LDH activity did not change by using MP alone, CsA alone, MitoQ alone, pAD/scrRNAi alone, TMP+pAD/14-3-3 $\gamma$ -shRNA, TMP+pAD/scrRNAi, TMP+ABT-737, and TMP+Atr when compared with the control group ( $P>0.05$ ). However, the cell viability of treatment with pAD/14-3-3 $\gamma$ -shRNA alone, ABT-737 alone or Atr alone were lower and the LDH activity was higher compared to that of the control group ( $P<0.01$ ), indicating that 14-3-3 $\gamma$  expression, Bcl-2 activity, and mPTP closing play an important role in maintaining normal cell function, and pAD/scrRNAi as a negative control couldn't affect cell viability and LDH activity. (A) Histogram of the cell viability. (B) Histogram of the LDH activity. Data are presented as the mean  $\pm$  SEM for eight individual experiments. Data are presented as the mean  $\pm$  SEM for eight individual experiments. a:  $P<0.01$ , versus control group.

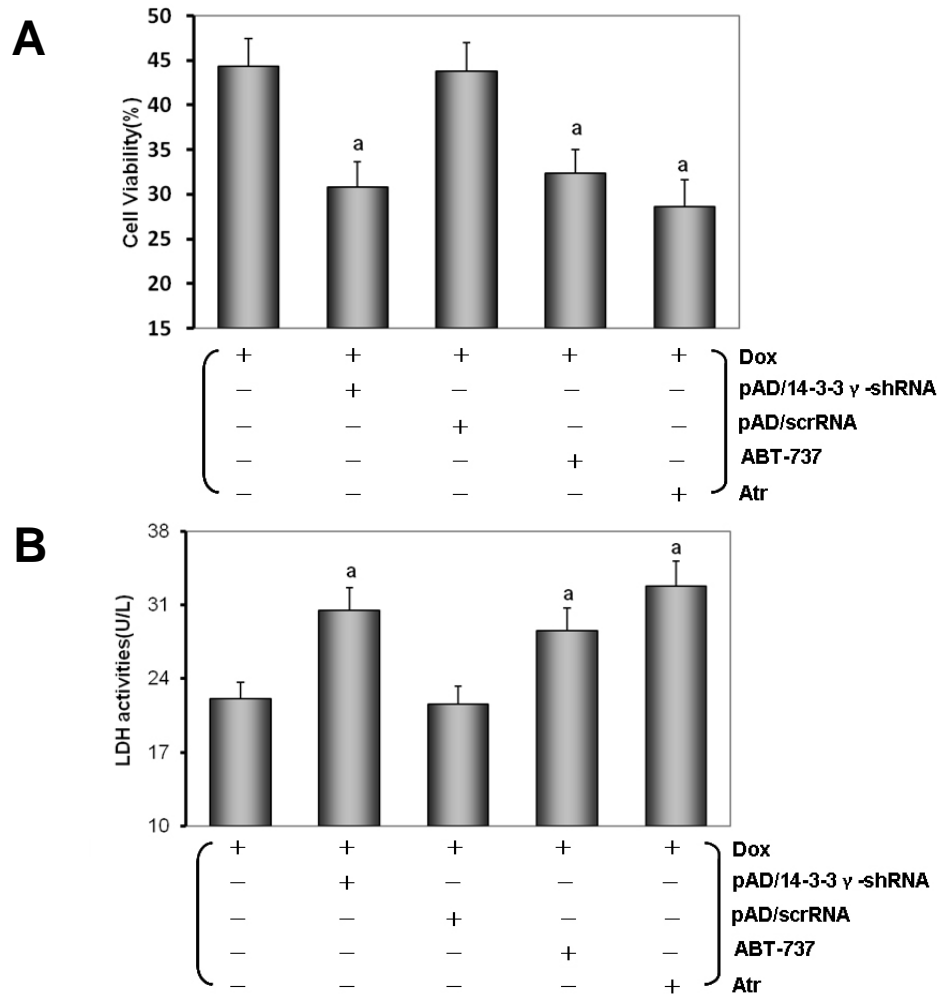

**Figure S4: Effects of downregulated 14-3-3 $\gamma$  expression, or inhibited Bcl-2 activity on the cell viability and LDH activity of HUVECs by Dox injury.** The cell viability of treatment with pAD/14-3-3 $\gamma$ -shRNA+Dox, ABT-737+Dox, and Atr+Dox were lower and the LDH activity was higher compared to that of the Dox group ( $P < 0.01$ ), however, cell viability and LDH activity did not change when using pAD/scrRNAi+Dox ( $P > 0.05$ ), indicating that treatment with pAD/14-3-3 $\gamma$ -shRNA down-regulated the expression of 14-3-3 $\gamma$ , or using ABT-737 inhibited Bcl-2, or allowing Atr to open the mPTP, thereby aggravating HUVECs injury, and pAD/scrRNAi as a negative control couldn't affect cell viability and LDH activity. (A) Histogram of the cell viability. (B) Histogram of the LDH activity. Data are presented as the mean  $\pm$  SEM for eight individual experiments. a:  $P < 0.01$ , versus control group.

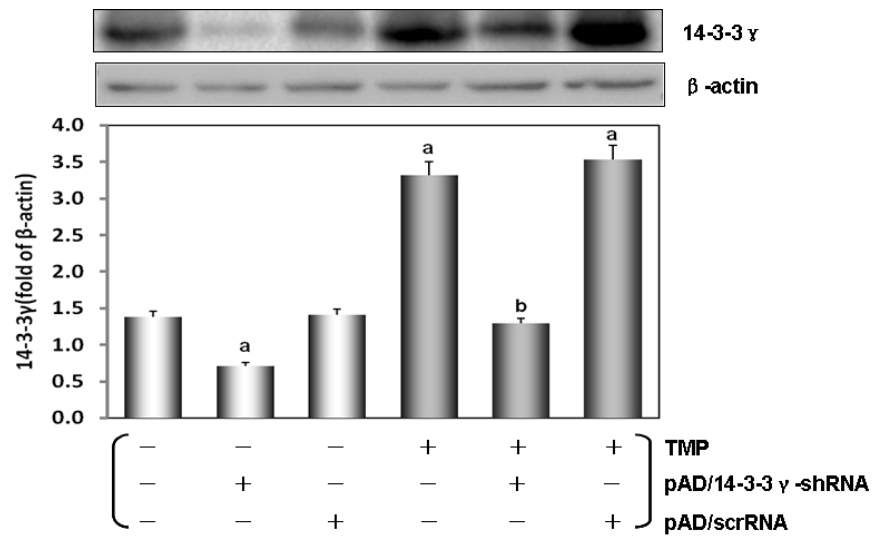

**Figure S5: Effects of TMP, pAD/14-3-3γ-shRNA and pAD/scrRNAi on 14-3-3γ expression of normal HUVECs.** TMP could significantly up-regulated 14-3-3γ expression of normal HUVECs, pAD/14-3-3γ-shRNA could selectively silence 14-3-3 expression effectively, and pAD/scrRNAi as a negative control couldn't affect 14-3-3 expression. Data are presented as the mean  $\pm$  SEM for five individual experiments. a:  $P < 0.01$ , versus control group, b:  $P < 0.01$ , versus TMP group

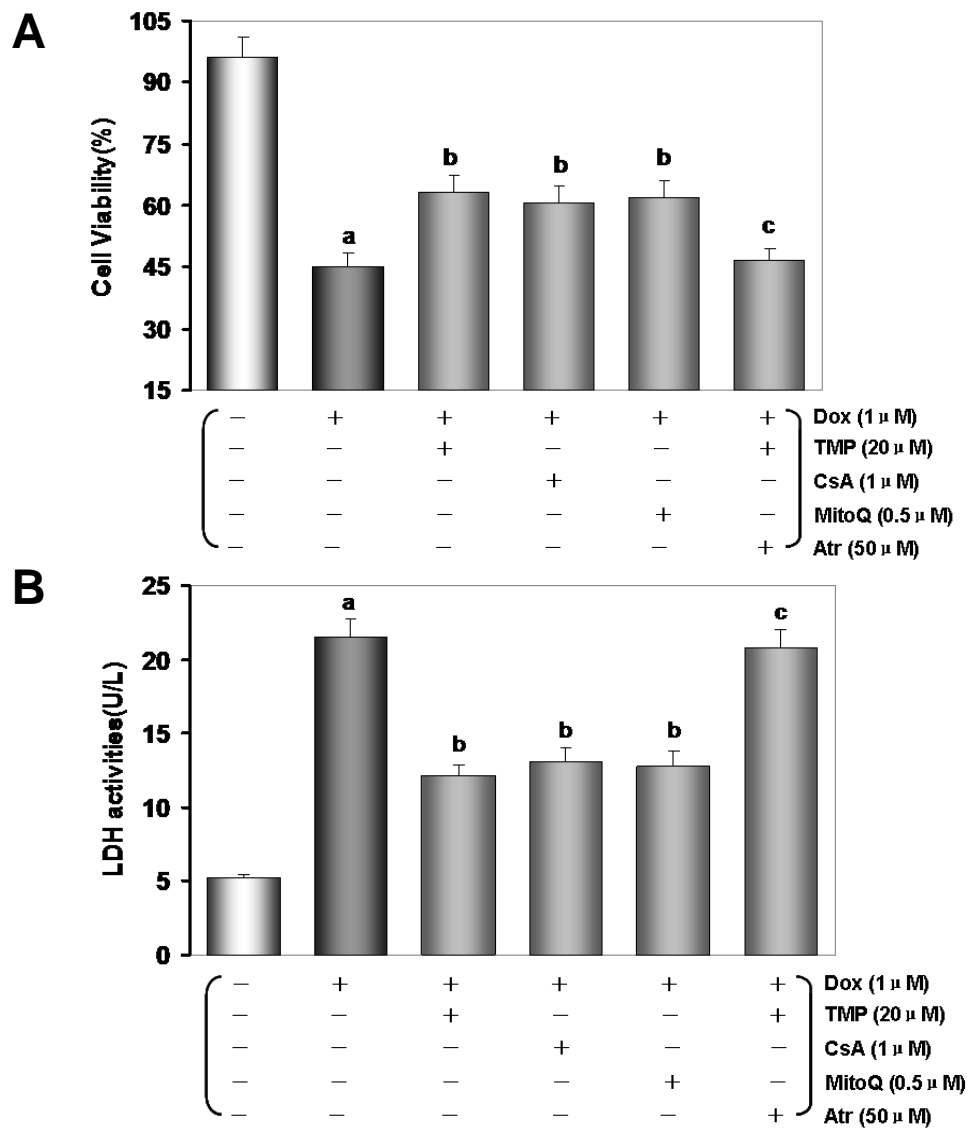

**Figure S6: Effects of TMP/CsA/MitoQ, or TMP added 50  $\mu$ M Atr on the cell viability and LDH activity of HUVECs injured by 1  $\mu$ M Dox.** TMP/CsA/MitoQ with 1  $\mu$ M Dox co-treat HUVECs, the cell viability increased and LDH activity decreased, however added 50  $\mu$ M Atr could reverse the related effects of TMP. (A) Histogram of the cell viability. (B) Histogram of the LDH activity. Data are presented as the mean  $\pm$  SEM for eight individual experiments. a:  $P < 0.01$ , versus control group; b:  $P < 0.01$ , versus Dox group; c:  $P < 0.01$ , versus TMP+Dox group.
